# Supplementary material for: Exceptional preservation of tiny embryos documents seed dormancy in early angiosperms
Source: Springer Nature journal article supplement (doi:10.1038/nature16441), 2015-12-01
Supplement: 41586_2015_BFnature16441_MOESM329_ESM.pdf [file 41586_2015_BFnature16441_MOESM329_ESM.pdf]

# SUPPLEMENTARY INFORMATION

doi:10.1038/nature16441

| Specimen no | Sample no        | Taxon                             | Unit studied       | Seed coat      | Embryo                   | Nutritive storage tissue           |
|-------------|------------------|-----------------------------------|--------------------|----------------|--------------------------|------------------------------------|
| PP54021     | Kenilworth 061   | <i>Anacostia marylandensis</i>    | one-seeded fruit   | exotestal      | embryo preserved         | nutritive tissue preserved, partly |
| PP54076     | Kenilworth 061   | <i>Anacostia marylandensis</i>    | one-seeded fruit   | exotestal      |                          | seed empty                         |
| PP54084     | Kenilworth 175   | <i>Anacostia marylandensis</i>    | one-seeded fruit   | exotestal      |                          | seed empty                         |
| PP54091     | Kenilworth 174   | <i>Anacostia marylandensis</i>    | seed               | exotestal      |                          | seed empty                         |
| PP54092     | Kenilworth 174   | <i>Anacostia marylandensis</i>    | one-seeded fruit   | exotestal      |                          | seed empty                         |
| PP54093     | Kenilworth 174   | <i>Anacostia marylandensis</i>    | one-seeded fruit   | exotestal      |                          | nutritive tissue preserved, partly |
| PP54094     | Kenilworth 174   | <i>Anacostia marylandensis</i>    | one-seeded fruit   | exotestal      |                          | nutritive tissue preserved, partly |
| PP54095     | Kenilworth 174   | <i>Anacostia marylandensis</i>    | one-seeded fruit   | exotestal      |                          | nutritive tissue preserved, partly |
| PP54096     | Kenilworth 174   | <i>Anacostia marylandensis</i>    | seed               | exotestal      |                          | seed empty                         |
| S172400     | Famalicão 25     | <i>Anacostia</i> sp.              | seed               | exotestal      |                          | seed empty                         |
| S172401     | Famalicão 25     | <i>Anacostia</i> sp.              | seed               | exotestal      |                          | nutritive tissue poorly preserved  |
| S174031     | Famalicão 25     | <i>Anacostia</i> sp.              | seed               | exotestal      |                          | seed empty                         |
| S174032     | Famalicão 25     | <i>Anacostia</i> sp.              | seed               | exotestal      | embryo preserved, partly | nutritive tissue preserved         |
| S174168     | Vale de Agua 408 | <i>Anacostia</i> sp.              | seed               | exotestal      |                          | seed empty                         |
| PP54042     | Puddledock 082   | <i>Anacostia virginensis</i>      | one-seeded fruit   | exotestal      | embryo preserved, partly | nutritive tissue preserved, partly |
| PP54046     | Puddledock 082   | <i>Anacostia virginensis</i>      | one-seeded fruit   | exotestal      |                          | nutritive tissue preserved, partly |
| PP54034     | Puddledock 156   | <i>Appomattoxia ancistrophora</i> | one-seeded fruit   | seed coat thin | empty space from embryo  | nutritive tissue preserved, partly |
| PP54065     | Puddledock 156   | <i>Appomattoxia ancistrophora</i> | one-seeded fruit   | seed coat thin | embryo preserved         |                                    |
| PP54067     | Puddledock 156   | <i>Appomattoxia ancistrophora</i> | one-seeded fruit   | endotestal     |                          | nutritive tissue preserved, partly |
| S153507     | Famalicão 25     | <i>Canrightia resinifera</i>      | two-seeded fruit   | endotestal     |                          | nutritive tissue preserved, partly |
| S153508     | Famalicão 25     | <i>Canrightia resinifera</i>      | two-seeded fruit   | endotestal     |                          | nutritive tissue preserved, partly |
| S170111     | Famalicão 25     | <i>Canrightia resinifera</i>      | two-seeded fruit   | endotestal     |                          | nutritive tissue preserved, partly |
| S170112     | Famalicão 25     | <i>Canrightia resinifera</i>      | two-seeded fruit   | endotestal     |                          | seed empty                         |
| S171506     | Catefica 50      | <i>Canrightia resinifera</i>      | seed               | endotestal     |                          | seed empty                         |
| S171507     | Catefica 50      | <i>Canrightia resinifera</i>      | seed               | endotestal     |                          | seed empty                         |
| S171508     | Catefica 50      | <i>Canrightia resinifera</i>      | two-seeded fruit   | endotestal     |                          | seed empty                         |
| S171509     | Catefica 50      | <i>Canrightia resinifera</i>      | three-seeded fruit | endotestal     |                          | seed empty                         |
| S171510     | Famalicão 25     | <i>Canrightia resinifera</i>      | seed               | endotestal     |                          | nutritive tissue preserved, partly |
| S171511     | Famalicão 25     | <i>Canrightia resinifera</i>      | seed               | endotestal     |                          | nutritive tissue preserved, partly |
| S171512     | Famalicão 25     | <i>Canrightia resinifera</i>      | seed               | endotestal     |                          | nutritive tissue preserved, partly |
| S171513     | Famalicão 25     | <i>Canrightia resinifera</i>      | seed               | endotestal     |                          | nutritive tissue preserved, partly |
| S174008     | Catefica 50      | <i>Canrightia resinifera</i>      | two-seeded fruit   | endotestal     |                          | seed empty                         |
| S174312     | Catefica 153     | <i>Canrightia resinifera</i>      | three-seeded fruit | endotestal     |                          | seed empty                         |
| S174100     | Torres Vedras 38 | <i>Canrightia</i> sp.             | three-seeded fruit | endotestal     |                          | nutritive tissue preserved, partly |
| S174039     | Catefica 49      | <i>Canrightiopsis crassitesta</i> | one-seeded fruit   | endotestal     |                          | seed empty                         |
| S174159     | Catefica 49      | <i>Canrightiopsis crassitesta</i> | one-seeded fruit   | endotestal     | empty space from embryo  | nutritive tissue preserved, partly |
| S174248     | Catefica 49      | <i>Canrightiopsis crassitesta</i> | one-seeded fruit   | endotestal     |                          | seed empty                         |
| S174310     | Catefica 154     | <i>Canrightiopsis crassitesta</i> | one-seeded fruit   | endotestal     |                          | nutritive tissue preserved, partly |
| S174311     | Catefica 343     | <i>Canrightiopsis crassitesta</i> | one-seeded fruit   | endotestal     |                          | seed empty                         |
| P0311       | Juncal-Chicalhão | <i>Canrightiopsis dinisii</i>     | one-seeded fruit   | endotestal     |                          | seed empty                         |
| S174004     | Famalicão 25     | <i>Canrightiopsis intermedia</i>  | one-seeded fruit   | endotestal     |                          | seed empty                         |
| S174005     | Famalicão 25     | <i>Canrightiopsis intermedia</i>  | one-seeded fruit   | endotestal     | embryo preserved         | nutritive tissue preserved, partly |
| S174006     | Famalicão 25     | <i>Canrightiopsis intermedia</i>  | one-seeded fruit   | endotestal     | empty space from embryo  | nutritive tissue preserved, partly |
| S174023     | Famalicão 25     | <i>Canrightiopsis intermedia</i>  | seed               | endotestal     |                          | seed empty                         |
| S174024     | Famalicão 25     | <i>Canrightiopsis intermedia</i>  | seed               | endotestal     | embryo preserved, poorly | nutritive tissue preserved, partly |

|         |                  |                                  |                  |                |                          |                                    |
|---------|------------------|----------------------------------|------------------|----------------|--------------------------|------------------------------------|
| S174025 | Famalicão 25     | <i>Canrightiopsis intermedia</i> | seed             | endotestal     |                          | nutritive tissue preserved, partly |
| S174026 | Famalicão 25     | <i>Canrightiopsis intermedia</i> | seed             | endotestal     |                          | seed empty                         |
| S174027 | Famalicão 25     | <i>Canrightiopsis intermedia</i> | seed             | endotestal     | empty space from embryo  | nutritive tissue preserved, partly |
| S174028 | Famalicão 25     | <i>Canrightiopsis intermedia</i> | seed             | endotestal     |                          | seed empty                         |
| S174033 | Famalicão 25     | <i>Canrightiopsis intermedia</i> | seed             | endotestal     |                          | nutritive tissue preserved, partly |
| S174104 | Buarcos 157      | <i>Canrightiopsis intermedia</i> | one-seeded fruit | endotestal     |                          | nutritive tissue preserved, partly |
| S174105 | Buarcos 157      | <i>Canrightiopsis intermedia</i> | one-seeded fruit | endotestal     |                          | nutritive tissue preserved, partly |
| S174107 | Famalicão 25     | <i>Canrightiopsis intermedia</i> | one-seeded fruit | endotestal     | empty space from embryo  | nutritive tissue preserved, partly |
| S174108 | Famalicão 25     | <i>Canrightiopsis intermedia</i> | one-seeded fruit | endotestal     |                          | nutritive tissue preserved, partly |
| S174148 | Famalicão 25     | <i>Canrightiopsis intermedia</i> | one-seeded fruit | endotestal     | embryo preserved, poorly | nutritive tissue preserved, partly |
| S174150 | Famalicão 25     | <i>Canrightiopsis intermedia</i> | one-seeded fruit | endotestal     |                          | nutritive tissue preserved, partly |
| S174151 | Famalicão 25     | <i>Canrightiopsis intermedia</i> | one-seeded fruit | endotestal     | embryo preserved, poorly | nutritive tissue preserved, partly |
| S174152 | Famalicão 25     | <i>Canrightiopsis intermedia</i> | one-seeded fruit | endotestal     | embryo preserved         | nutritive tissue preserved, partly |
| S174153 | Famalicão 25     | <i>Canrightiopsis intermedia</i> | one-seeded fruit | endotestal     | embryo preserved         | nutritive tissue preserved, partly |
| S174155 | Famalicão 25     | <i>Canrightiopsis intermedia</i> | one-seeded fruit | endotestal     | embryo preserved         | nutritive tissue preserved, partly |
| S174156 | Famalicão 25     | <i>Canrightiopsis intermedia</i> | one-seeded fruit | endotestal     |                          | seed empty                         |
| S174157 | Famalicão 25     | <i>Canrightiopsis intermedia</i> | one-seeded fruit | endotestal     | empty space from embryo  | nutritive tissue preserved, partly |
| S174174 | Vale de Agua 331 | <i>Canrightiopsis intermedia</i> | one-seeded fruit | endotestal     | empty space from embryo  | nutritive tissue preserved, partly |
| S172333 | Catefica 153     | <i>Canrightiopsis</i> sp.        | seed             | endotestal     |                          | nutritive tissue preserved, partly |
| S174040 | Catefica 49      | <i>Canrightiopsis</i> sp.        | one-seeded fruit | endotestal     |                          | seed empty                         |
| S174149 | Famalicão 25     | <i>Canrightiopsis</i> sp.        | one-seeded fruit | endotestal     |                          | seed empty                         |
| S174309 | Catefica 154     | <i>Canrightiopsis</i> sp.        | one-seeded fruit | endotestal     |                          | seed empty                         |
| PP53966 | Puddledock 156   | <i>Couperites</i> sp.            | one-seeded fruit | exotestal      |                          | seed empty                         |
| PP53967 | Puddledock 156   | <i>Couperites</i> sp.            | one-seeded fruit | exotestal      |                          | seed empty                         |
| PP53967 | Puddledock 156   | <i>Couperites</i> sp.            | one-seeded fruit | exotestal      |                          | strongly compressed                |
| PP54031 | Puddledock 156   | <i>Couperites</i> sp.            | seed             | exotestal      |                          | seed empty                         |
| PP54032 | Puddledock 156   | <i>Couperites</i> sp.            | seed             | exotestal      |                          | seed empty                         |
| PP54071 | Puddledock 156   | <i>Couperites</i> sp.            | one-seeded fruit | exotestal      |                          | seed empty                         |
| PP54072 | Puddledock 156   | <i>Couperites</i> sp.            | one-seeded fruit | exotestal      |                          | seed empty                         |
| S170235 | Famalicão 25     | Taxon 01                         | seed             | exotestal      | embryo preserved         | nutritive tissue preserved         |
| S170236 | Famalicão 25     | Taxon 01                         | seed             | exotestal      | empty space from embryo  | nutritive tissue preserved, partly |
| S174034 | Famalicão 25     | Taxon 01                         | seed             | exotestal      |                          | nutritive tissue preserved, partly |
| S174346 | Famalicão 25     | Taxon 01                         | seed             | exotestal      |                          | seed almost empty                  |
| S174348 | Famalicão 25     | Taxon 01                         | seed             | exotestal      |                          | seed empty                         |
| S174349 | Famalicão 25     | Taxon 01                         | seed             | exotestal      |                          | seed almost empty                  |
| S174350 | Famalicão 25     | Taxon 01                         | seed             | exotestal      |                          | nutritive tissue preserved, partly |
| S174351 | Famalicão 25     | Taxon 01                         | seed             | exotestal      | embryo preserved, partly | nutritive tissue preserved, partly |
| S174431 | Famalicão 25     | Taxon 01                         | seed             | exotestal      | empty space from embryo  | nutritive tissue preserved, partly |
| S174432 | Famalicão 25     | Taxon 01                         | seed             | exotestal      |                          | seed empty                         |
| S174433 | Famalicão 25     | Taxon 01                         | seed             | exotestal      |                          | seed almost empty                  |
| S174471 | Famalicão 25     | Taxon 01                         | seed             | exotestal      |                          | seed empty                         |
| S174473 | Famalicão 25     | Taxon 01                         | seed             | exotestal      | empty space from embryo  | nutritive tissue preserved, partly |
| PP53991 | Puddledock 156   | Taxon 02                         | one-seeded fruit | seed coat thin | embryo preserved         | nutritive tissue preserved         |
| PP54069 | Puddledock 156   | Taxon 02                         | seed             | seed coat thin | embryo preserved, partly | nutritive tissue preserved, partly |
| S170238 | Famalicão 25     | Taxon 03                         | seed             | exotestal      |                          | nutritive tissue preserved, partly |
| S170239 | Famalicão 25     | Taxon 03                         | seed             | exotestal      | embryo preserved, partly | nutritive tissue preserved, partly |
| S174035 | Famalicão 25     | Taxon 03                         | seed             | exotestal      | empty space from embryo  | nutritive tissue preserved, partly |

|         |                  |          |                  |                |                          |                                    |
|---------|------------------|----------|------------------|----------------|--------------------------|------------------------------------|
| S174343 | Famalicão 25     | Taxon 03 | seed             | exotestal      |                          | seed empty                         |
| S174345 | Famalicão 25     | Taxon 03 | seed             | exotestal      | embryo preserved, partly | nutritive tissue preserved, partly |
| S174352 | Famalicão 25     | Taxon 03 | seed             | exotestal      | empty space from embryo  | nutritive tissue preserved, partly |
| S174353 | Famalicão 25     | Taxon 03 | seed             | exotestal      | empty space from embryo  | nutritive tissue preserved, partly |
| S174467 | Famalicão 25     | Taxon 03 | seed             | exotestal      | embryo preserved, partly | nutritive tissue preserved         |
| S174469 | Famalicão 25     | Taxon 03 | seed             | exotestal      | embryo preserved         | nutritive tissue preserved         |
| S174470 | Famalicão 25     | Taxon 03 | seed             | exotestal      | embryo preserved, partly | nutritive tissue preserved         |
| S174472 | Famalicão 25     | Taxon 03 | seed             | exotestal      | embryo preserved         | nutritive tissue preserved         |
| S174474 | Famalicão 25     | Taxon 03 | seed             | exotestal      | embryo preserved         | nutritive tissue preserved         |
| S105218 | Famalicão 25     | Taxon 04 | seed             | exotestal      |                          | seed almost empty                  |
| S170234 | Famalicão 25     | Taxon 04 | seed             | exotestal      |                          | seed empty                         |
| S174336 | Famalicão 25     | Taxon 04 | seed             | exotestal      |                          | nutritive tissue preserved, partly |
| S174354 | Famalicão 25     | Taxon 04 | seed             | exotestal      | empty space from embryo  | nutritive tissue preserved, partly |
| S174430 | Famalicão 25     | Taxon 04 | seed             | exotestal      | empty space from embryo  | nutritive tissue preserved, partly |
| S174435 | Famalicão 25     | Taxon 04 | seed             | exotestal      |                          | seed almost empty                  |
| S174468 | Famalicão 25     | Taxon 04 | seed             | exotestal      | embryo preserved         | nutritive tissue preserved         |
| S174171 | Vale de Agua 408 | Taxon 05 | seed             | exotestal      |                          | nutritive tissue preserved, partly |
| S154533 | Famalicão 25     | Taxon 06 | seed             | exotestal      | empty space from embryo  | nutritive tissue preserved, partly |
| S172316 | Catefica 49      | Taxon 07 | seed             | exotestal      | embryo preserved, partly | nutritive tissue preserved, partly |
| S170237 | Famalicão 25     | Taxon 08 | seed             | exotestal      |                          | nutritive tissue preserved, partly |
| S174337 | Famalicão 25     | Taxon 08 | seed             | exotestal      |                          | seed empty                         |
| S174338 | Famalicão 25     | Taxon 08 | seed             | exotestal      | empty space from embryo  | nutritive tissue preserved, partly |
| S174339 | Famalicão 25     | Taxon 08 | seed             | exotestal      |                          | nutritive tissue preserved, partly |
| S174340 | Famalicão 25     | Taxon 08 | seed             | exotestal      |                          | seed empty                         |
| S174341 | Famalicão 25     | Taxon 08 | seed             | exotestal      |                          | nutritive tissue preserved, partly |
| S174347 | Famalicão 25     | Taxon 08 | seed             | exotestal      |                          | nutritive tissue preserved, partly |
| S174358 | Arazede 374      | Taxon 08 | seed             | exotestal      |                          | nutritive tissue preserved, partly |
| S174179 | Vale de Agua 141 | Taxon 09 | seed             | exotestal      |                          | seed empty                         |
| S174338 | Famalicão 25     | Taxon 09 | seed             | exotestal      | empty space from embryo  | nutritive tissue preserved         |
| S174036 | Vale de Agua 265 | Taxon 10 | seed             | exotestal      |                          | seed empty                         |
| S174189 | Vale de Agua 141 | Taxon 10 | seed             | exotestal      |                          | seed empty                         |
| S174363 | Arazede 374      | Taxon 10 | seed             | exotestal      | embryo preserved, partly | nutritive tissue preserved, partly |
| S170110 | Famalicão 25     | Taxon 11 | seed             | exotestal      |                          | seed empty                         |
| S170232 | Famalicão 25     | Taxon 11 | seed             | exotestal      |                          | seed empty                         |
| S170233 | Famalicão 25     | Taxon 11 | seed             | exotestal      |                          | seed empty                         |
| S172332 | Catefica 153     | Taxon 11 | seed             | exotestal      |                          | seed empty                         |
| S174177 | Vale de Agua 141 | Taxon 11 | seed             | exotestal      |                          | seed empty                         |
| S174178 | Vale de Agua 141 | Taxon 11 | seed             | exotestal      | empty space from embryo  | nutritive tissue preserved, partly |
| S174344 | Famalicão 25     | Taxon 11 | seed             | exotestal      | empty space from embryo  | nutritive tissue preserved, partly |
| S174187 | Vale de Agua 329 | Taxon 12 | one-seeded fruit | endotestal?    | embryo preserved, partly | nutritive tissue preserved, partly |
| S170240 | Famalicão 25     | Taxon 13 | seed             | seed coat thin | embryo preserved         | nutritive tissue preserved, partly |
| S174424 | Famalicão 25     | Taxon 13 | seed             | seed coat thin |                          | nutritive tissue preserved, partly |
| S174425 | Famalicão 25     | Taxon 13 | seed             | seed coat thin | embryo preserved         | nutritive tissue preserved, partly |
| S170241 | Famalicão 25     | Taxon 14 | seed             | endotestal     |                          | seed empty                         |
| S170242 | Famalicão 25     | Taxon 14 | seed             | endotestal     | embryo preserved, partly | nutritive tissue preserved, partly |
| S174029 | Famalicão 25     | Taxon 14 | seed             | endotestal     |                          | seed empty                         |

|                     |                     |          |                      |                    |                          |                                    |
|---------------------|---------------------|----------|----------------------|--------------------|--------------------------|------------------------------------|
| S174030             | Famalicão 25        | Taxon 14 | seed                 | endotestal         | embryo preserved, poorly |                                    |
| S174422             | Famalicão 25        | Taxon 14 | seed                 | endotestal         |                          | seed empty                         |
| S170108/<br>S174095 | Famalicão 25        | Taxon 15 | three-seeded fruit   | endotestal         |                          | seed empty                         |
| S170109             | Famalicão 25        | Taxon 15 | three-seeded fruit   | endotestal         |                          | seed empty                         |
| S170229             | Famalicão 25        | Taxon 15 | three-seeded fruit   | endotestal         | embryo preserved, partly | nutritive tissue preserved, partly |
| S170230             | Famalicão 25        | Taxon 15 | four-seeded fruit    | endotestal         | embryo preserved, partly | nutritive tissue preserved, partly |
| S170231             | Famalicão 25        | Taxon 15 | three-seeded fruit   | endotestal         |                          | seed empty                         |
| S170227             | Famalicão 25        | Taxon 16 | three-seeded fruit   | endotestal         |                          | nutritive tissue preserved, partly |
| S170228             | Famalicão 25        | Taxon 16 | three-seeded fruit   | endotestal         |                          | seed empty                         |
| S171535             | Torres Vedras<br>43 | Taxon 16 | four-seeded fruit    | endotestal         |                          | nutritive tissue preserved, partly |
| S174158             | Famalicão 25        | Taxon 16 | two-seeded fruit     | endotestal         |                          | seed empty                         |
| S174169             | Vale de Agua<br>408 | Taxon 16 | two-seeded fruit     | endotestal         |                          | nutritive tissue preserved, partly |
| S174176             | Vale de Agua<br>364 | Taxon 16 | two-seeded fruit     | endotestal         |                          | seed empty                         |
| S174360             | Arazede 374         | Taxon 16 | two-seeded fruit     | endotestal         |                          | seeds empty                        |
| S174361             | Arazede 374         | Taxon 16 | one-seeded fruit     | endotestal         |                          | seeds empty                        |
| S174434             | Famalicão 25        | Taxon 16 | three-seeded fruit   | endotestal         |                          | seed empty                         |
| S174439             | Famalicão 25        | Taxon 16 | three-seeded fruit   | endotestal         |                          | seeds empty                        |
| S174098             | Torres Vedras<br>38 | Taxon 17 | seed                 | ?                  |                          | too compressed                     |
| S172321             | Catefica 49         | Taxon 18 | one-seeded fruit     | seed coat<br>thin  |                          | nutritive tissue preserved, partly |
| S172323             | Catefica 49         | Taxon 18 | one-seeded fruit     | seed coat<br>thin  |                          | seed empty                         |
| S174162             | Catefica 342        | Taxon 18 | one-seeded fruit     | seed coat<br>thin  |                          | seed empty                         |
| S135459             | Vale de Agua<br>383 | Taxon 19 | two-seeded fruit     | seed coat<br>thin  |                          | seeds empty                        |
| S174163             | Vale de Agua<br>408 | Taxon 19 | two-seeded fruit     | seed coat<br>thin  |                          | nutritive tissue preserved, partly |
| S174172             | Vale de Agua<br>363 | Taxon 19 | two-seeded fruit     | seed coat<br>thin  |                          | nutritive tissue preserved, partly |
| S174173             | Vale de Agua<br>363 | Taxon 19 | three-seeded fruit   | seed coat<br>thin  |                          | seed empty                         |
| S174436             | Vale de Agua<br>328 | Taxon 19 | two-seeded fruit     | seed coat<br>thin  | embryo preserved         | nutritive tissue preserved, partly |
| S174037             | Vale de Agua<br>265 | Taxon 20 | one-seeded fruit     | seed coat<br>thin  |                          | nutritive tissue preserved, partly |
| S174314             | Catefica 153        | Taxon 21 | one-seeded fruit     | seed coat<br>thin  | empty space from embryo  | nutritive tissue preserved, partly |
| S174188             | Vale de Agua<br>363 | Taxon 22 | one-seeded fruit     | exotestal          | empty space from embryo  | nutritive tissue preserved, partly |
| S174362             | Arazede 374         | Taxon 22 | one-seeded fruit     | exotestal          |                          | nutritive tissue preserved, partly |
| S174420             | Famalicão 25        | Taxon 22 | one-seeded fruit     | exotestal          |                          | seed empty                         |
| S171515             | Catefica 343        | Taxon 23 | several-seeded fruit | seed coat<br>thin  |                          | seeds empty                        |
| S171524             | Catefica 50         | Taxon 23 | several-seeded fruit | seed coat<br>thin  |                          | seeds empty                        |
| S172313             | Catefica 49         | Taxon 24 | one-seeded fruit     | seed coat<br>thin  |                          | nutritive tissue preserved, partly |
| S172324             | Catefica 49         | Taxon 24 | one-seeded fruit     | seed coat<br>thin  |                          | nutritive tissue preserved, partly |
| S172325             | Catefica 49         | Taxon 24 | one-seeded fruit     | seed coat<br>thin  |                          | strongly compressed                |
| S172328             | Buarcos 371         | Taxon 24 | one-seeded fruit     | seed coat<br>thin  |                          | nutritive tissue preserved, partly |
| S174186             | Vale de Agua<br>329 | Taxon 24 | one-seeded fruit     | seed coat<br>thin  | embryo preserved, partly | nutritive tissue preserved, partly |
| S174419             | Famalicão 25        | Taxon 25 | seed                 | testal-<br>tegmic? |                          | seed empty                         |
| S174190             | Vale de Agua<br>141 | Taxon 26 | seed                 | exotestal          |                          | nutritive tissue preserved, partly |
| S170243             | Famalicão 25        | Taxon 27 | seed                 | exotestal          |                          | seed empty                         |
| S174426             | Famalicão 25        | Taxon 28 | seed                 | exotestal          |                          | nutritive tissue preserved, partly |
| S174428             | Famalicão 25        | Taxon 28 | seed                 | exotestal          |                          | nutritive tissue preserved, partly |
| S174429             | Famalicão 25        | Taxon 28 | seed                 | exotestal          | embryo preserved, partly | nutritive tissue preserved, partly |

|         |                  |          |                  |                |                          |                                    |
|---------|------------------|----------|------------------|----------------|--------------------------|------------------------------------|
| S156205 | Buarcos 157      | Taxon 29 | one-seeded fruit | seed coat thin |                          | strongly compressed                |
| S153503 | Catefica 364     | Taxon 30 | one-seeded fruit | seed coat thin | embryo preserved         | nutritive tissue preserved, partly |
| S154531 | Arazede 372      | Taxon 30 | one-seeded fruit | seed coat thin |                          | nutritive tissue preserved, partly |
| S174115 | Vila Verde 2     | Taxon 30 | one-seeded fruit | seed coat thin |                          | seed empty                         |
| S156372 | Buarcos 157      | Taxon 31 | one-seeded fruit | seed coat thin |                          | strongly compressed                |
| S172317 | Catefica 49      | Taxon 32 | seed             | exotestal      |                          | seed empty                         |
| S172319 | Catefica 49      | Taxon 33 | seed             | exotestal      |                          | seed empty                         |
| S174417 | Famalicão 25     | Taxon 34 | seed             | exotestal      |                          | strongly compressed                |
| S174342 | Famalicão 25     | Taxon 35 | seed             | exotestal      |                          | seed empty                         |
| S174427 | Famalicão 25     | Taxon 36 | one-seeded fruit | seed coat thin | embryo preserved, partly | nutritive tissue preserved, partly |
| S174175 | Vale de Agua 141 | Taxon 37 | seed             | seed coat thin | embryo preserved, partly |                                    |
| PP53965 | Puddledock 156   | Taxon 38 | one-seeded fruit | seed coat thin |                          | seed empty                         |
| PP53989 | Puddledock 156   | Taxon 38 | one-seeded fruit | seed coat thin |                          | seed empty                         |
| PP53990 | Puddledock 156   | Taxon 38 | one-seeded fruit | seed coat thin |                          | nutritive tissue preserved, partly |
| PP53992 | Puddledock 156   | Taxon 38 | one-seeded fruit | seed coat thin | embryo preserved         |                                    |
| PP54037 | Puddledock 156   | Taxon 38 | one-seeded fruit | seed coat thin |                          | seed empty                         |
| PP54068 | Puddledock 156   | Taxon 38 | one-seeded fruit | seed coat thin |                          | seed empty                         |
| PP54101 | Puddledock 156   | Taxon 38 | one-seeded fruit | seed coat thin |                          | nutritive tissue preserved, partly |
| PP54102 | Puddledock 156   | Taxon 38 | one-seeded fruit | seed coat thin | embryo preserved, partly | nutritive tissue preserved, partly |
| PP54103 | Puddledock 156   | Taxon 38 | one-seeded fruit | seed coat thin |                          | seed empty                         |
| PP54104 | Puddledock 156   | Taxon 38 | one-seeded fruit | seed coat thin | embryo preserved, partly | nutritive tissue preserved, partly |
| PP54105 | Puddledock 156   | Taxon 38 | one-seeded fruit | seed coat thin |                          | seed empty                         |
| PP54106 | Puddledock 156   | Taxon 38 | one-seeded fruit | seed coat thin |                          | nutritive tissue preserved, partly |
| PP53952 | Puddledock 151   | Taxon 39 | one-seeded fruit | seed coat thin | embryo preserved         | nutritive tissue preserved         |
| PP53957 | Puddledock 151   | Taxon 39 | one-seeded fruit | seed coat thin |                          | seed empty                         |
| PP53958 | Puddledock 156   | Taxon 39 | one-seeded fruit | seed coat thin |                          | seed empty                         |
| PP53959 | Puddledock 156   | Taxon 39 | one-seeded fruit | seed coat thin |                          | seed empty                         |
| PP53995 | Puddledock 073   | Taxon 40 | one-seeded fruit | seed coat thin |                          | nutritive tissue preserved, partly |
| PP53978 | Puddledock 083   | Taxon 41 | one-seeded fruit | seed coat thin |                          | seed empty                         |
| PP53964 | Puddledock 156   | Taxon 42 | one-seeded fruit | seed coat thin |                          | seed empty                         |
| PP54107 | Puddledock 156   | Taxon 42 | one-seeded fruit | seed coat thin |                          | nutritive tissue preserved, partly |
| PP54112 | Puddledock 156   | Taxon 42 | one-seeded fruit | seed coat thin |                          | seed empty                         |
| PP54111 | Puddledock 156   | Taxon 43 | one-seeded fruit | seed coat thin | empty space from embryo  | nutritive tissue preserved, partly |
| PP54153 | Puddledock 185   | Taxon 44 | one-seeded fruit | exotestal      |                          | seed almost empty                  |
| PP54088 | Kenilworth 174   | Taxon 45 | one-seeded fruit | seed coat thin |                          | strongly compressed                |
| PP54089 | Kenilworth 174   | Taxon 45 | one-seeded fruit | seed coat thin |                          | strongly compressed                |
| PP54090 | Kenilworth 174   | Taxon 45 | one-seeded fruit | seed coat thin |                          | strongly compressed                |
| PP54100 | Kenilworth 061   | Taxon 45 | one-seeded fruit | seed coat thin |                          | strongly compressed                |
| PP53968 | Puddledock 082   | Taxon 46 | one-seeded fruit | seed coat thin |                          | seed empty                         |
| PP53969 | Puddledock 082   | Taxon 46 | one-seeded fruit | seed coat thin |                          | seed empty                         |
| PP53970 | Puddledock 082   | Taxon 46 | one-seeded fruit | seed coat thin |                          | nutritive tissue preserved, partly |
| PP54086 | Kenilworth 175   | Taxon 47 | one-seeded fruit | seed coat thin | embryo preserved, partly | nutritive tissue preserved, partly |

|         |                |          |                   |                |                          |                                    |
|---------|----------------|----------|-------------------|----------------|--------------------------|------------------------------------|
| PP54056 | Puddledock 143 | Taxon 48 | two-seeded fruit  | seed coat thin |                          | nutritive tissue preserved, partly |
| PP54048 | Kenilworth 174 | Taxon 49 | one-seeded fruit  | seed coat thin |                          | nutritive tissue preserved         |
| PP54022 | Kenilworth 060 | Taxon 50 | one-seeded fruit  | seed coat thin |                          | nutritive tissue preserved, partly |
| PP54025 | Dutch Gap 098  | Taxon 51 | seed              | ?              |                          | seed empty                         |
| PP53972 | Puddledock 082 | Taxon 52 | seed              | exotestal      | embryo preserved, partly | nutritive tissue preserved, partly |
| PP53973 | Puddledock 082 | Taxon 52 | seed              | exotestal      | embryo preserved         | nutritive tissue preserved, partly |
| PP53993 | Puddledock 156 | Taxon 52 | seed              | exotestal      | empty space from embryo  | nutritive tissue preserved, partly |
| PP54039 | Puddledock 156 | Taxon 52 | seed              | exotestal      | embryo preserved, partly |                                    |
| PP54052 | Kenilworth 174 | Taxon 53 | seed              | exotestal      | empty space from embryo  | nutritive tissue preserved         |
| PP54075 | Kenilworth 061 | Taxon 53 | seed              | exotestal      |                          | seed empty                         |
| PP54082 | Kenilworth 175 | Taxon 53 | seed              | exotestal      | empty space from embryo  | nutritive tissue preserved         |
| PP53999 | Puddledock 073 | Taxon 54 | one-seeded fruit  | seed coat thin |                          | seed empty                         |
| PP54041 | Puddledock 082 | Taxon 55 | seed              | exotestal      | empty space from embryo  | nutritive tissue preserved, partly |
| PP54035 | Puddledock 156 | Taxon 56 | seed              | exotestal      |                          | seed empty                         |
| PP53974 | Puddledock 082 | Taxon 57 | one-seeded fruit  | seed coat thin |                          | seed empty                         |
| PP53975 | Puddledock 082 | Taxon 57 | one-seeded fruit  | seed coat thin |                          | seed empty                         |
| PP53976 | Puddledock 082 | Taxon 57 | one-seeded fruit  | seed coat thin |                          | seed empty                         |
| PP54110 | Puddledock 156 | Taxon 58 | seed              | exotestal      |                          | seed empty                         |
| PP54062 | Puddledock 151 | Taxon 59 | seed              | seed coat thin | embryo preserved, partly | nutritive tissue preserved, partly |
| PP54108 | Puddledock 156 | Taxon 59 | seed              | seed coat thin | embryo preserved         | nutritive tissue preserved, partly |
| PP54109 | Puddledock 156 | Taxon 59 | seed              | seed coat thin |                          | nutritive tissue preserved, partly |
| PP54073 | Puddledock 156 | Taxon 60 | seed              | seed coat thin | embryo preserved, partly | nutritive tissue preserved, partly |
| PP54074 | Puddledock 156 | Taxon 61 | seed              | seed coat thin |                          | nutritive tissue preserved, partly |
| PP54098 | Kenilworth 174 | Taxon 62 | five-seeded fruit | endotestal?    |                          | seed empty                         |
| PP54038 | Puddledock 156 | Taxon 63 | two-seeded fruit  | endotestal?    |                          | seed empty                         |
| PP54083 | Kenilworth 175 | Taxon 64 | seed              | seed coat thin |                          | seed empty                         |
| PP54043 | Puddledock 082 | Taxon 65 | two-seeded fruit  | exotestal      |                          | nutritive tissue preserved, partly |
| PP54049 | Kenilworth 174 | Taxon 66 | two-seeded fruit  | exotestal      |                          | seed empty                         |
| PP54014 | Kenilworth 061 | Taxon 67 | seed              | exotestal      |                          | seed empty                         |
